# Supplementary material for: Differentiation of peptide isomers by excited-state photodissociation and ion–molecule interactions
Source: Royal Society of Chemistry journal article supplement (doi:10.1039/d0cp04111d), 2020-01-01
Supplement: d0cp04111d1.pdf [file d0cp04111d1.pdf]

## **Supporting Information**

### **Differentiation of Peptide Isomers by Excited-State Photodissociation and Ion-Molecule Interactions**

Brielle L. Van Orman, Hoi-Ting Wu, Ryan R. Julian\*

Department of Chemistry, University of California, Riverside, California 92521, United States

Corresponding Author

\* correspondence should be sent to: [ryan.julian@ucr.edu](mailto:ryan.julian@ucr.edu)

Department of Chemistry, University of California, Riverside, 501 Big Springs Road, Riverside, CA 92521, USA, (951) 827-3959

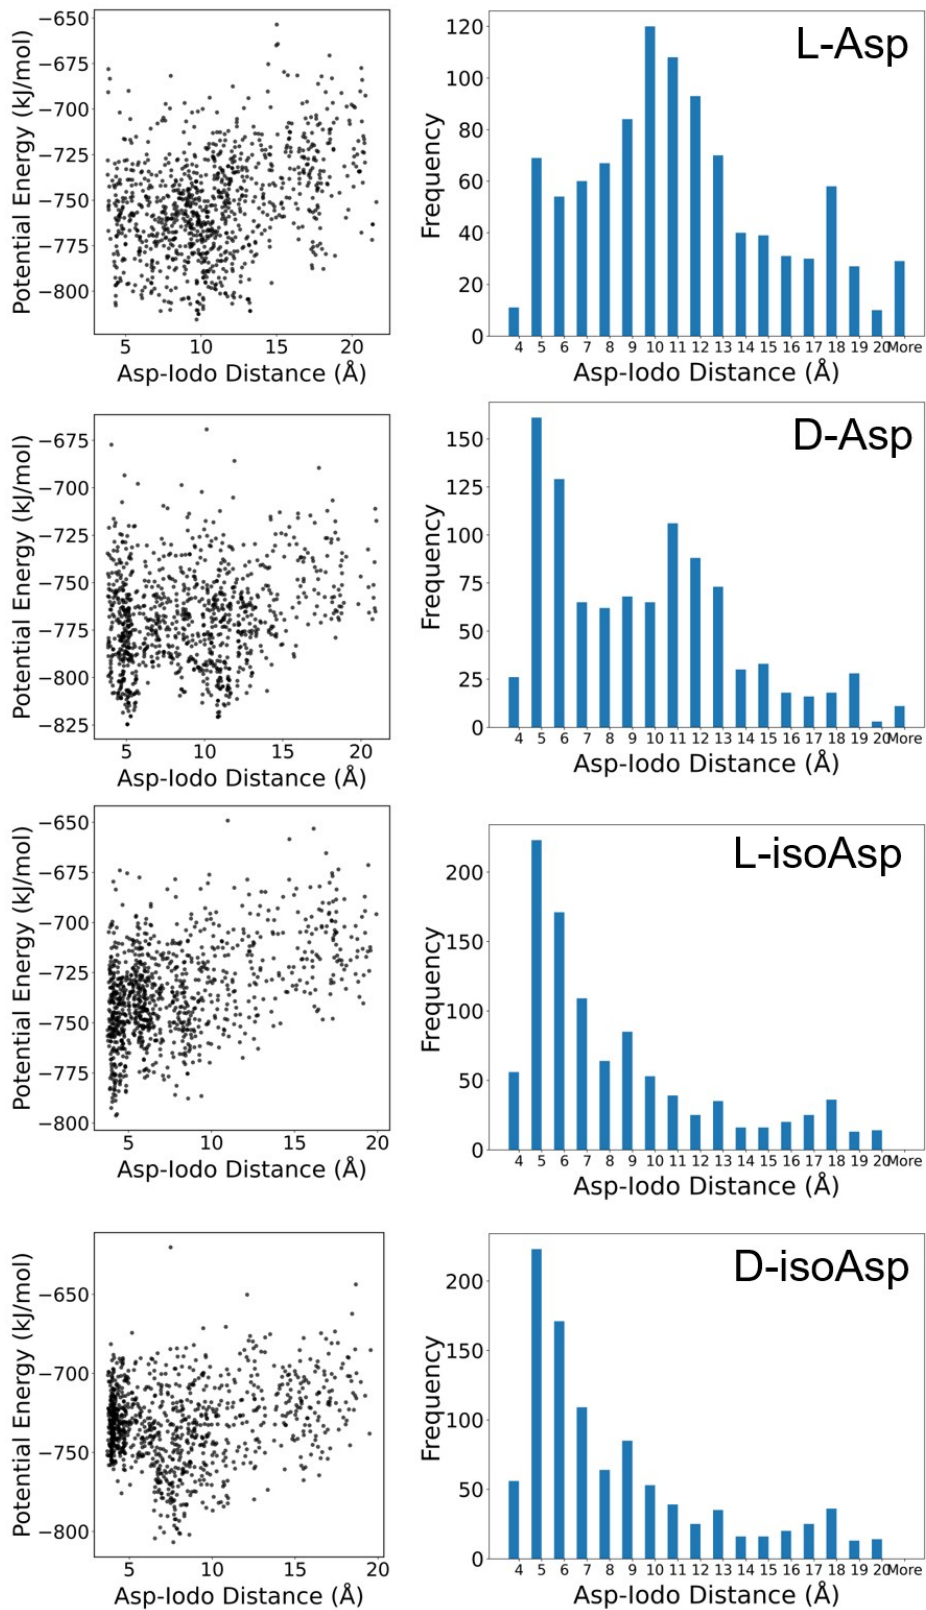

**Figure S1:** Full range of structures generated by simulated annealing of 4IB-VKLDHG, where Fig. 6 shows structures with potential energy within the lowest 50 kJ.

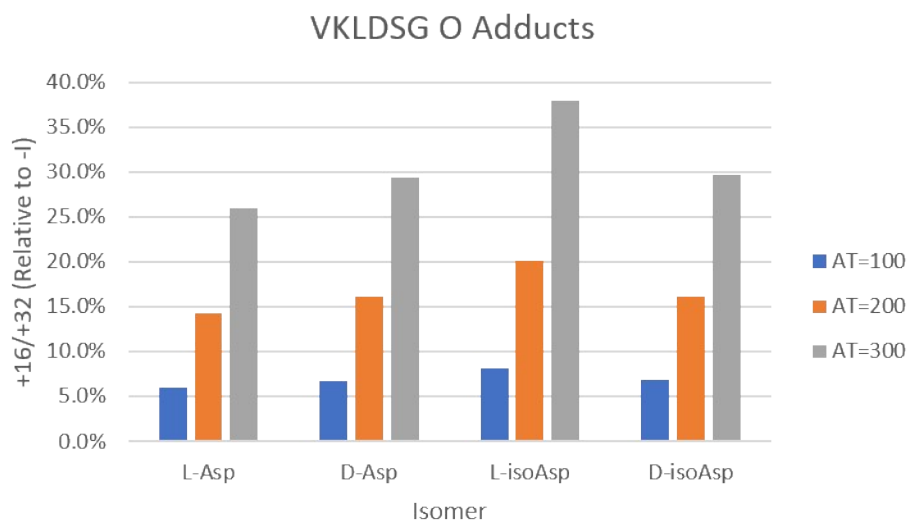

**Figure S2:** Ratio of +16/+32 Da oxygen adducts as a function of laser excitation time. Increased time corresponds to increased production of +16 Da. This is consistent with two-step process where O<sub>2</sub> initially adds to the radical site, followed by loss of O after a subsequent laser pulse.
